# Supplementary material
Source: PubMed Central journal article supplement (PMC4824023)

# Behavior Scores

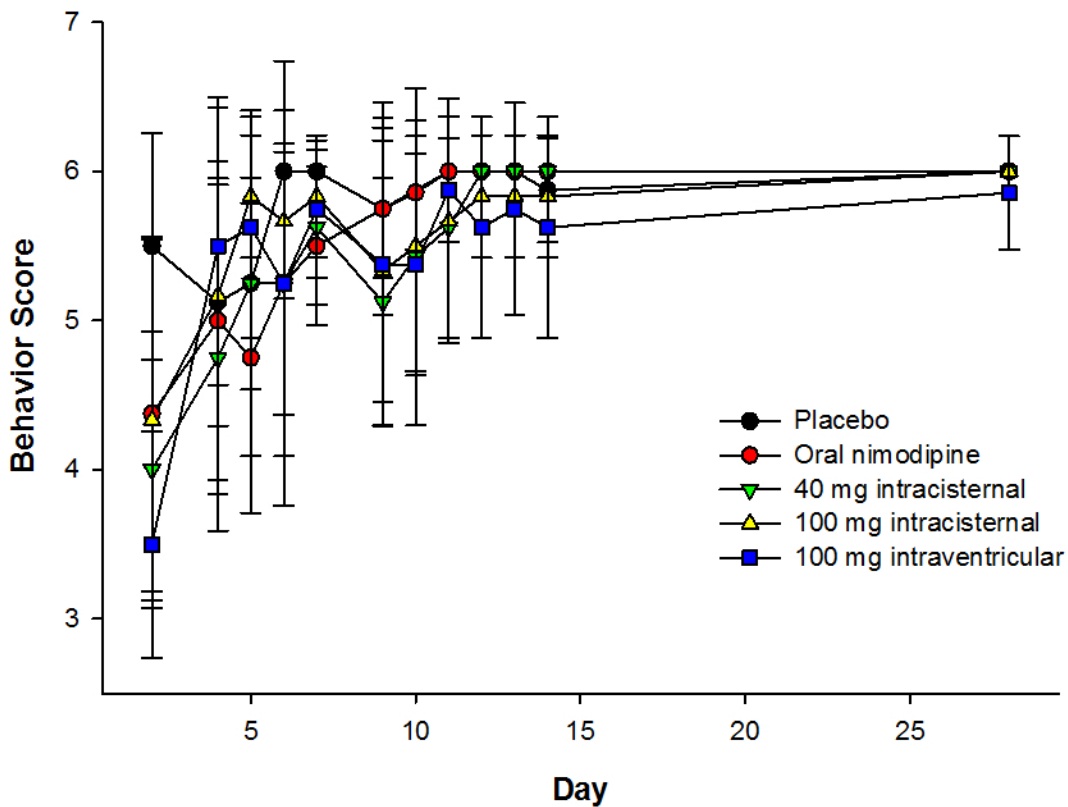

Supplement: 13311_2016_424_MOESM3_ESM.pdf [file 13311_2016_424_MOESM3_ESM.pdf]
